# Supplementary material for: Electrospun carbon nanofiber@CoS2core/sheath hybrid as an efficient all-pH hydrogen evolution electrocatalyst
Source: Royal Society of Chemistry journal article supplement (doi:10.1039/c6qi00229c), 2016-01-01
Supplement: c6qi00229c1.pdf [file c6qi00229c1.pdf]

**Electrospun carbon nanofiber@CoS<sub>2</sub> core/sheath hybrid as efficient all-  
pH hydrogen evolution electrocatalyst**

**Electronic Supplementary Information**

Huahao Gu,<sup>a</sup> Yunpeng Huang,<sup>a</sup> Lizeng Zuo,<sup>a</sup> Wei Fan\*<sup>b</sup> and Tianxi Liu\*<sup>a,b</sup>

<sup>a</sup> *State Key Laboratory of Molecular Engineering of Polymers, Department of Macromolecular Science, Fudan University, 220 Handan Road, Shanghai 200433, P. R. China. E-mail: txliu@fudan.edu.cn, Tel: +86-21-55664197; Fax: +86-21-65640293.*

<sup>b</sup> *State Key Laboratory for Modification of Chemical Fibers and Polymer Materials, College of Materials Science and Engineering, Donghua University, 2999 North Renmin Road, Shanghai 201620, P. R. China. E-mail: weifan@dhu.edu.cn*

### **Calculation of loading ratio of the CoS<sub>2</sub> in CNF@CoS<sub>2</sub> hybrid:**

Making a hypothesis that the mass percentage of CNF in CNF@CoS<sub>2</sub> hybrid is  $x$  while that of CoS<sub>2</sub> in CNF@CoS<sub>2</sub> hybrid is  $y$ . Consequently,  $x + y = 1$ .

From the TGA curve of pure CoS<sub>2</sub>, it can be found that through a complex phase change process, pure CoS<sub>2</sub> remains 74.3% of its original weight. In addition, from the TGA curve of pure CNF, it can be concluded that CNF has almost burned out at 700 °C in air atmosphere. Consequently, for CNF@CoS<sub>2</sub> hybrid with the residue weight percentage of 55.6%, equation can be listed as follows,  $y \times 74.3\% + x \times 0 = 1 \times 55.6\%$ .

According to the above two equations,  $y$  can be calculated as 74.8 wt% while  $x$  is 25.2 wt%, illustrating that CoS<sub>2</sub> accounts for the mass ratio of 74.8 wt% in the CNF@CoS<sub>2</sub> hybrid.

**Figure captions:**

**Fig. S1** FESEM image of CNF.

**Fig. S2** FESEM image of CNF@CoS<sub>2</sub>-3 hybrid and its corresponding EDS mapping images.

**Fig. S3** FESEM image of CNF@CoS<sub>2</sub>-9 hybrid in higher magnification.

**Fig. S4** FESEM image of CoS<sub>2</sub>.

**Fig. S5** XRD patterns of the products collected after thermal treatment of CNF@CoS<sub>2</sub>-3 hybrid at 700 °C and 900 °C.

**Fig. S6** Plots showing the extraction of the double layer capacitance ( $C_{dl}$ ) for CNF@CoS<sub>2</sub>-1 and CNF@CoS<sub>2</sub>-9 hybrids at 0.2 V.

**Fig. S7** Nyquist plots of CNF@CoS<sub>2</sub>-3 hybrid at various overpotentials in 0.5 M H<sub>2</sub>SO<sub>4</sub>.

**Fig. S8** FESEM image of CNF@CoS<sub>2</sub>-3 hybrid after cycling for 2000 s at low and high magnifications.

**Fig. S9** FESEM image of CNF@CoS<sub>2</sub>-3 hybrid after cycling test.

**Fig. S10** Time dependence of the current density for pure CoS<sub>2</sub> modified GCE recorded at -0.17 V versus RHE in 0.5 M H<sub>2</sub>SO<sub>4</sub> solution.

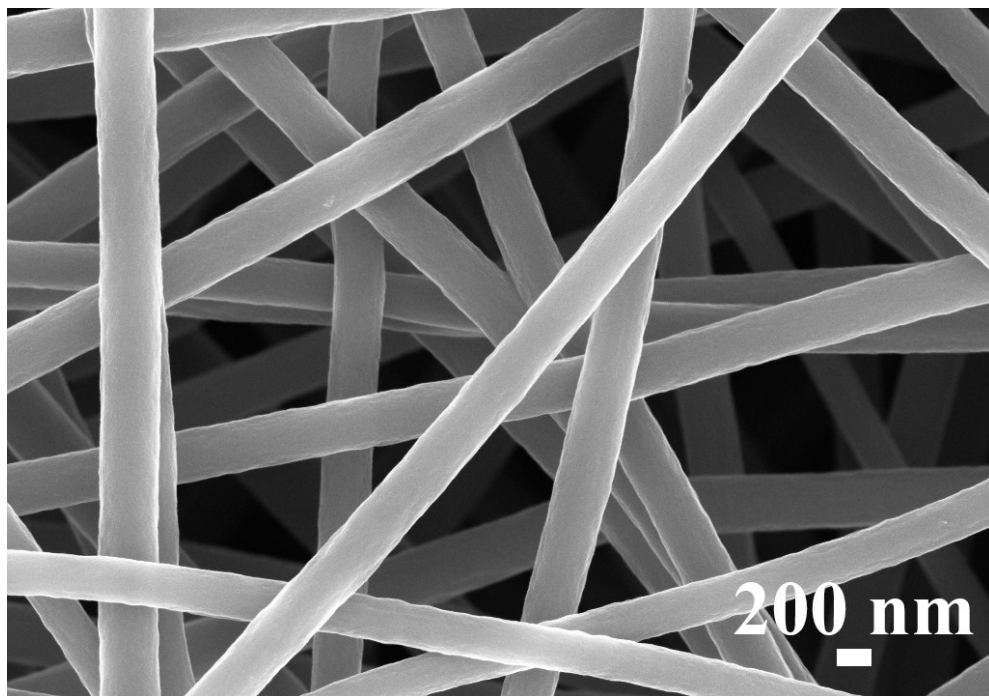

**Fig. S1**

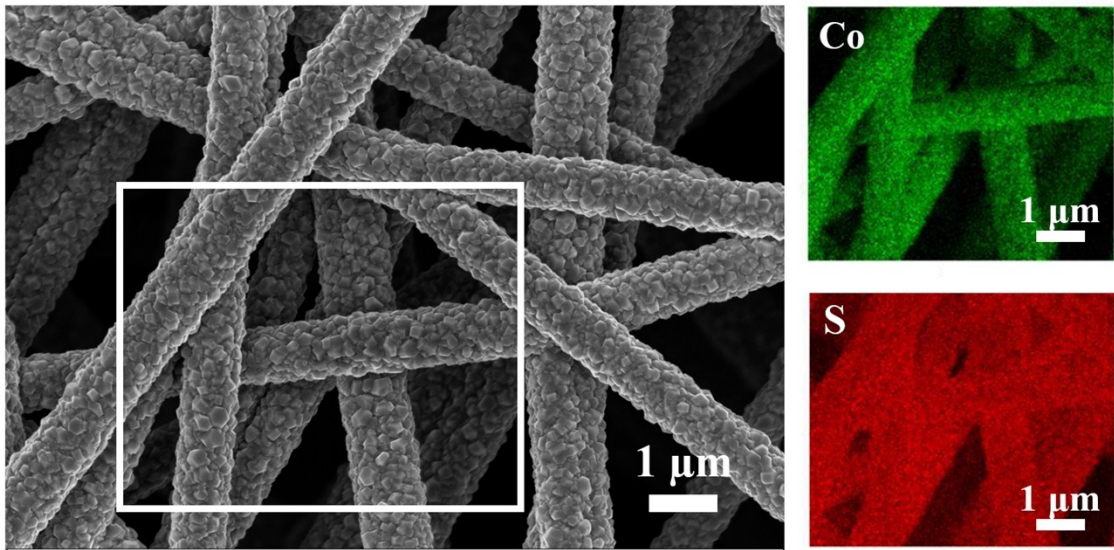

**Fig. S2**

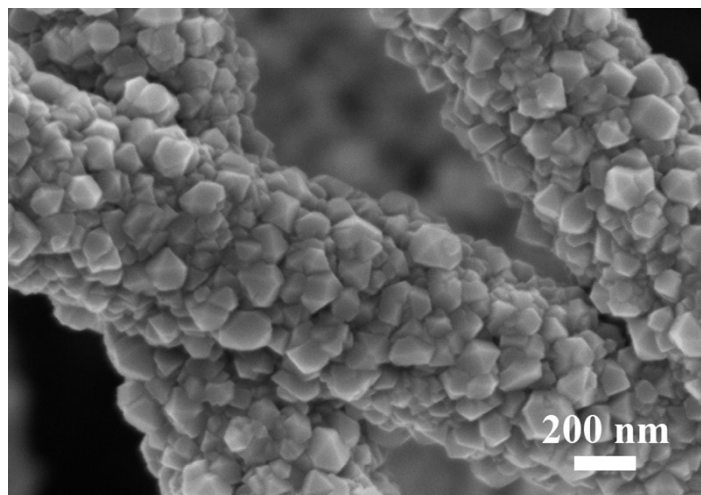

**Fig. S3**

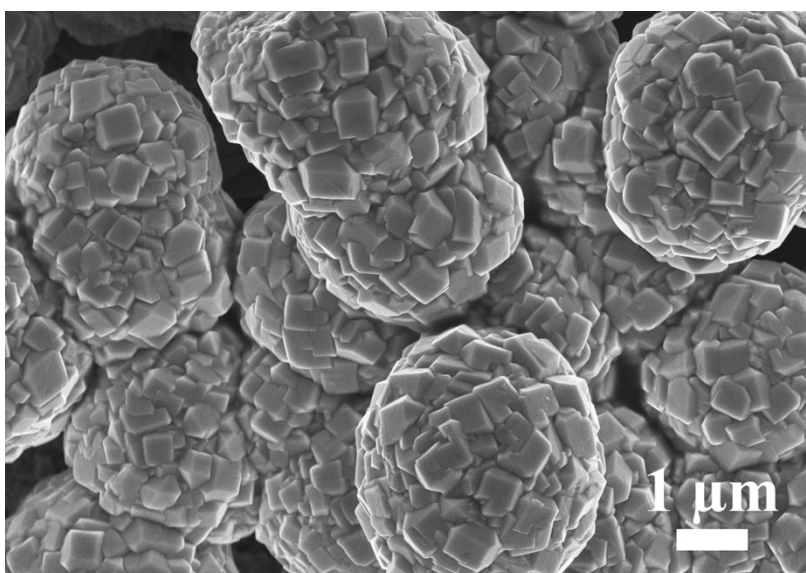

**Fig. S4**

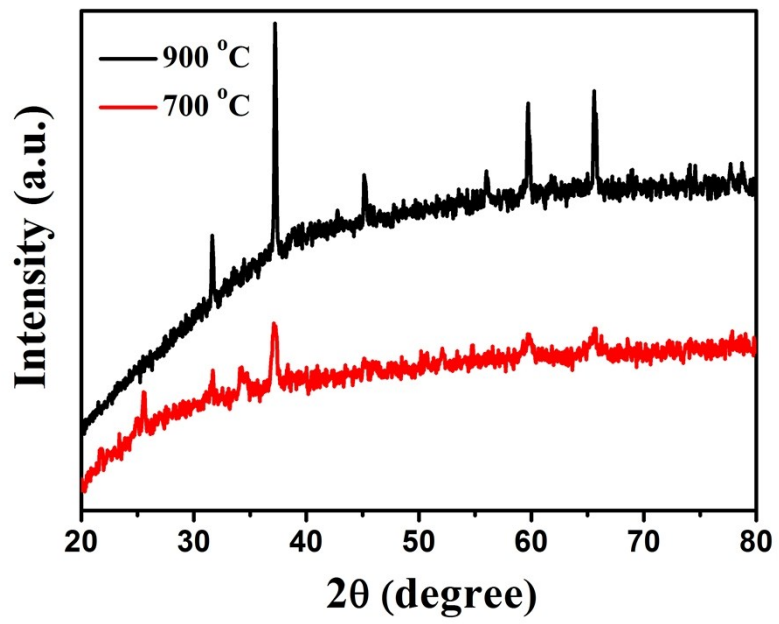

Fig. S5



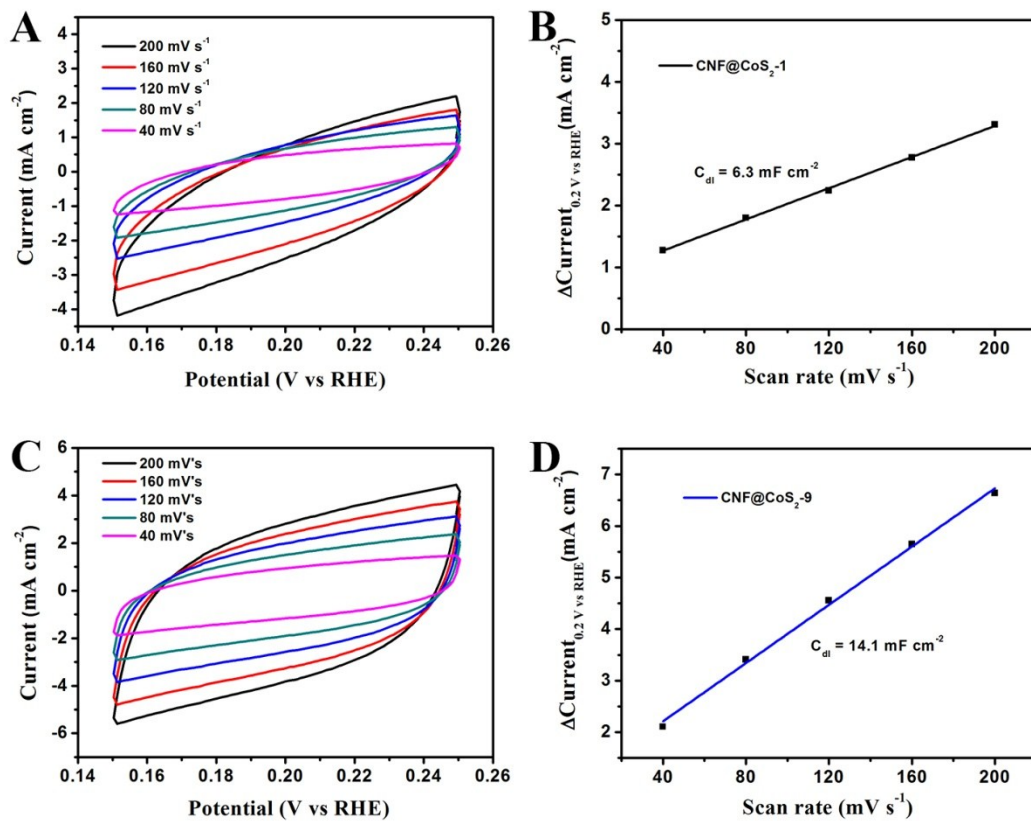

Fig. S6

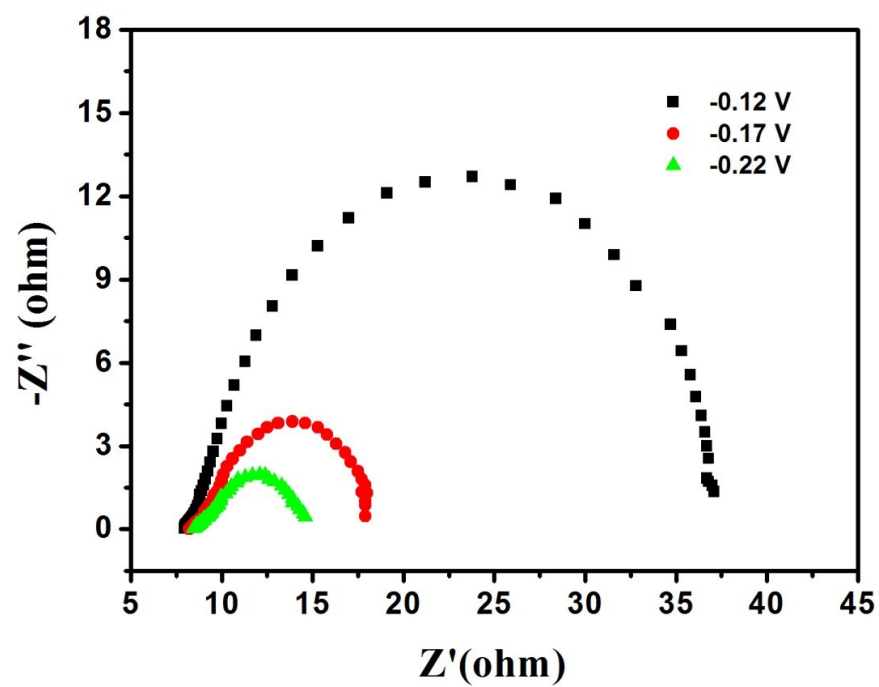

Fig. S7

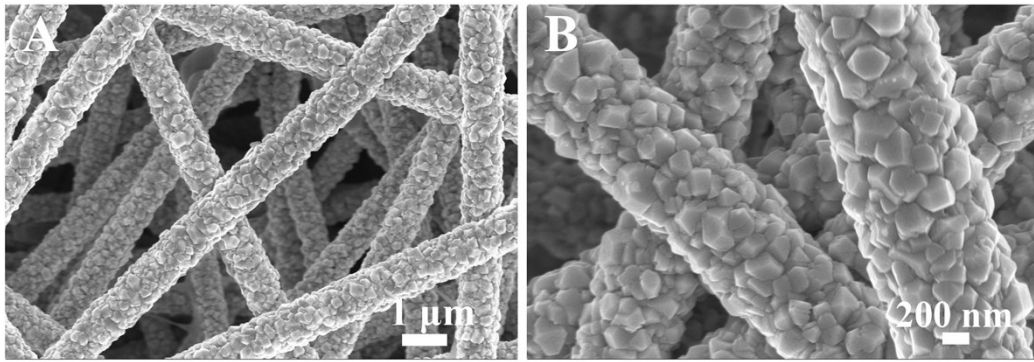

**Fig. S8**

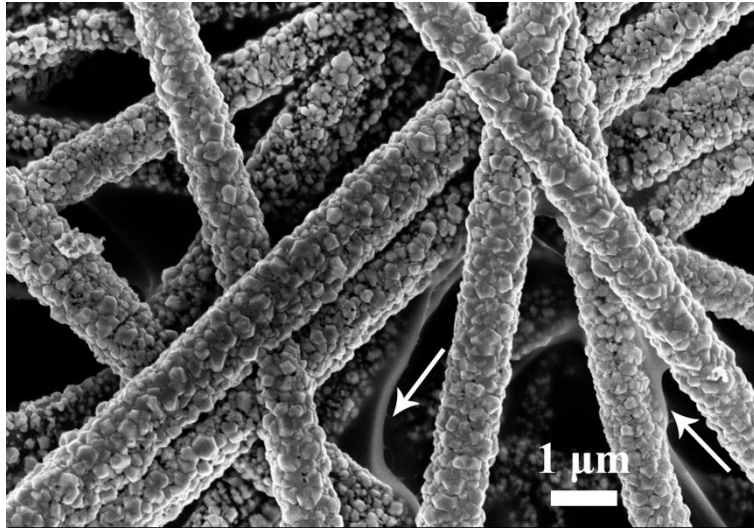

**Fig. S9**

(residual Nafion solution in white arrow)

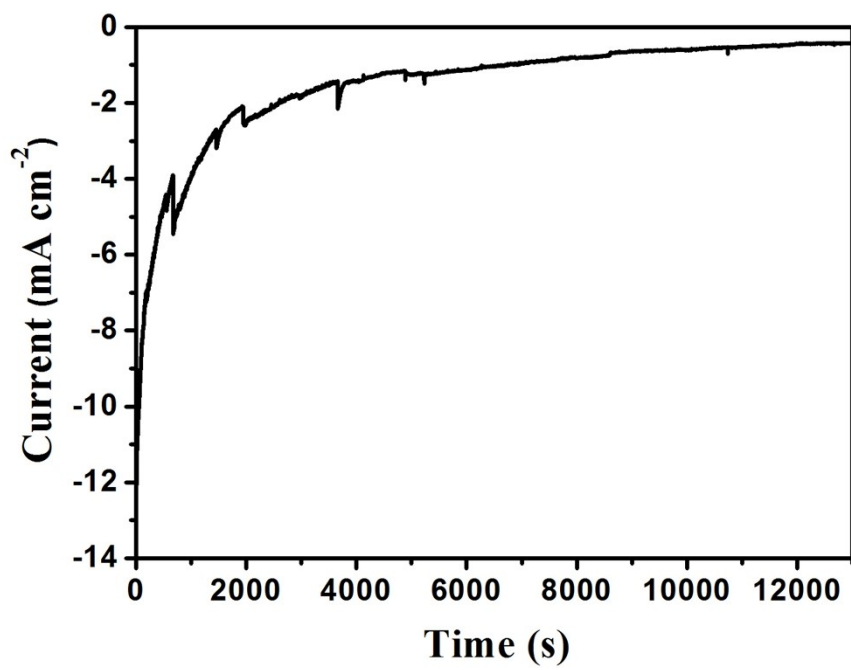

Fig. S10
